# Supplementary material for: Elevated CO2 shifts the functional structure and metabolic potentials of soil microbial communities in a C4 agroecosystem
Source: PubMed Central journal article supplement (PMC4366761; doi:10.1038/srep09316), 2015-03-20
Supplement: srep09316-s1.pdf [file srep09316-s1.pdf]

# Supplemental Information

## Elevated CO<sub>2</sub> shifts the functional structure and metabolic potentials of soil microbial communities in a C<sub>4</sub> agroecosystem

JinboXiong, Zhili He, Shengjing Shi, Angela Kent, Ye Deng, Liyou Wu, Joy D. Van Nostrand, and Jizhong Zhou

### A. Supplemental Tables

**Table S1** Quantitatively evaluates the effects of eCO<sub>2</sub> and soil depths on the functional gene categories by parametric permutational multivariate analysis of variance (perMANOVA)

**Table S2** The correlation of functional process involved in soil C and N dynamics with soil variables by Mantel test

**Table S3** P values of correlations between soil properties and signal intensities of functional genes by Mantel tests

### B. Supplemental Figures

**Figure S1** Non-metric multidimensional scaling (NMDS) analysis of elevated CO<sub>2</sub> (eCO<sub>2</sub>) and ambient CO<sub>2</sub> (aCO<sub>2</sub>) samples

**Figure S2** The normalized signal intensity of the detected key gene families involved in CO<sub>2</sub> fixation

**Figure S3** The normalized signal intensity of the detected key gene families involved in CH<sub>4</sub> cycling

**FigureS4**The abundance of detected key genes involved in P utilization

33 **Table S1** Quantitatively evaluates the effects of eCO<sub>2</sub> and soil depths on the functional gene  
 34 categories by parametric permutational multivariate analysis of variance (perMANOVA). R<sup>2</sup>  
 35 value is the constrained proportion of the parameter.

| Gene category              | eCO <sub>2</sub> |              | Depth          |              | eCO <sub>2</sub> :Depth |              |
|----------------------------|------------------|--------------|----------------|--------------|-------------------------|--------------|
|                            | R <sup>2</sup>   | <i>P</i>     | R <sup>2</sup> | <i>P</i>     | R <sup>2</sup>          | <i>P</i>     |
| C fixation                 | 0.105            | <b>0.001</b> | 0.056          | <b>0.008</b> | 0.036                   | 0.055        |
| C degradation              | 0.116            | <b>0.001</b> | 0.054          | <b>0.002</b> | 0.031                   | 0.068        |
| N fixation                 | 0.102            | <b>0.001</b> | 0.048          | <b>0.011</b> | 0.033                   | 0.067        |
| Nitrification              | 0.056            | <b>0.009</b> | 0.067          | <b>0.007</b> | 0.061                   | <b>0.005</b> |
| Denitrification            | 0.129            | <b>0.001</b> | 0.054          | <b>0.009</b> | 0.037                   | <b>0.039</b> |
| Assimilatory N reduction   | 0.104            | <b>0.001</b> | 0.046          | <b>0.018</b> | 0.063                   | <b>0.002</b> |
| Dissimilatory N reduction  | 0.131            | <b>0.001</b> | 0.052          | <b>0.016</b> | 0.037                   | 0.059        |
| Ammonification             | 0.093            | <b>0.001</b> | 0.056          | <b>0.001</b> | 0.033                   | <b>0.043</b> |
| P utilization              | 0.128            | <b>0.001</b> | 0.048          | <b>0.017</b> | 0.04                    | <b>0.023</b> |
| CH <sub>4</sub> production | 0.127            | <b>0.001</b> | 0.085          | <b>0.001</b> | 0.061                   | <b>0.003</b> |
| CH <sub>4</sub> oxidation  | 0.094            | <b>0.001</b> | 0.048          | <b>0.007</b> | 0.031                   | 0.097        |

36

37 **Table S2** The correlation of functional process involved in soil C and N dynamics with soil  
 38 variables by Mantel test.

| Functional category        | TN <sup>§</sup> |              | TC       |              |
|----------------------------|-----------------|--------------|----------|--------------|
|                            | <i>r</i>        | <i>p</i>     | <i>r</i> | <i>p</i>     |
| C fixation                 | 0.074           | 0.137        | -0.017   | 0.481        |
| C degradation              | 0.08            | 0.133        | 0.032    | 0.266        |
| N fixation                 | 0.146           | <b>0.024</b> | 0.141    | <b>0.051</b> |
| Nitrification              | 0.183           | <b>0.012</b> | 0.201    | <b>0.031</b> |
| Denitrification            | 0.057           | 0.192        | -0.016   | 0.487        |
| Ammonification             | 0.076           | 0.175        | -0.03    | 0.534        |
| Assimilatory N reduction   | 0.046           | 0.235        | 0.016    | 0.343        |
| Dissimilatory N reduction  | 0.067           | 0.146        | -0.043   | 0.687        |
| CH <sub>4</sub> production | 0.105           | 0.111        | -0.116   | 0.894        |
| CH <sub>4</sub> oxidation  | 0.166           | <b>0.049</b> | 0.037    | 0.294        |
| P utilization              | 0.074           | 0.113        | 0.028    | 0.304        |
| S cycling                  | 0.067           | 0.151        | 0.016    | 0.336        |

39  
 40 <sup>§</sup>:The other soil variables, including NO<sub>3</sub><sup>-</sup>, NH<sub>4</sub><sup>+</sup>, C:N ratio and corn yield that showed no  
 41 significant trends to any functional processes are not represented in this table.

42 **Table S3** *P* values of correlations between soil properties and signal intensities of functional  
 43 genes by Mantel test. Bold face indicates significantly changed *P* values (*P* < 0.05).

| Gene/enzyme           | Function                | NO <sub>3</sub> <sup>-</sup> | NH <sub>4</sub> <sup>+</sup> | TN           | TC           | C/N          |
|-----------------------|-------------------------|------------------------------|------------------------------|--------------|--------------|--------------|
| <b>0-5 cm soil</b>    |                         |                              |                              |              |              |              |
| <i>AceA</i>           | C degradation           | 0.763                        | 0.977                        | 0.179        | <b>0.009</b> | <b>0.025</b> |
| <i>amyA</i>           | C degradation           | 0.551                        | 0.694                        | <b>0.038</b> | 0.1          | 0.22         |
| <i>norB</i>           | Denitrification         | 0.854                        | 0.965                        | 0.607        | 0.129        | <b>0.032</b> |
| <i>alkB</i>           | Aromatics               | 0.414                        | <b>0.006</b>                 | 0.496        | 0.646        | 0.399        |
| <i>alkK</i>           | Aromatics               | 0.288                        | 0.98                         | 0.244        | <b>0.02</b>  | <b>0.027</b> |
| CDD                   | Aromatics               | 0.765                        | 0.469                        | 0.391        | 0.446        | <b>0.048</b> |
| <i>nagL</i>           | Aromatics               | 0.265                        | 0.753                        | 0.471        | 0.072        | <b>0.006</b> |
| <i>nhh</i>            | Aromatics               | 0.448                        | 0.909                        | 0.062        | <b>0.009</b> | 0.069        |
| <i>oxdB</i>           | Aromatics               | 0.552                        | 0.926                        | 0.279        | 0.039        | <b>0.032</b> |
| <i>phdG</i>           | Aromatics               | 0.634                        | <b>0.008</b>                 | 0.268        | 0.463        | 0.572        |
| <i>pheA</i>           | Aromatics               | 0.922                        | 0.824                        | <b>0.032</b> | <b>0.02</b>  | 0.074        |
| <i>tmoABE</i>         | Aromatics               | 0.211                        | 0.83                         | 0.067        | <b>0.033</b> | 0.099        |
| <i>xylXY</i>          | Aromatics               | 0.211                        | 0.902                        | 0.058        | <b>0.022</b> | 0.061        |
| <i>nphA</i>           | Aromatics               | 0.438                        | 0.365                        | <b>0.035</b> | 0.189        | 0.694        |
| <i>dxnA</i>           | Herbicides              | 0.345                        | 0.364                        | <b>0.027</b> | 0.497        | 0.662        |
| <i>mhpC</i>           | Herbicides              | 0.888                        | 0.947                        | 0.13         | <b>0.031</b> | 0.103        |
| <i>pcpA</i>           | Herbicides              | 0.7                          | 0.694                        | 0.056        | <b>0.017</b> | <b>0.046</b> |
| <i>pcpE</i>           | Herbicides              | 0.703                        | <b>0.049</b>                 | 0.235        | 0.389        | 0.792        |
| <i>cpnA</i>           | Hydrocarbons            | 0.384                        | 0.752                        | 0.126        | 0.051        | 0.097        |
| <i>nitA</i>           | Hydrocarbons            | 0.639                        | 0.854                        | 0.165        | <b>0.043</b> | 0.078        |
| <i>bco</i>            | Pesticides              | 0.214                        | 0.393                        | 0.425        | 0.067        | <b>0.019</b> |
| <i>dbdC</i>           | Aromatics               | 0.882                        | 0.618                        | <b>0.009</b> | 0.186        | 0.408        |
| <i>nphA</i>           | Aromatics               | 0.438                        | 0.365                        | <b>0.035</b> | 0.189        | 0.694        |
| <b>5-15 cm soil</b>   |                         |                              |                              |              |              |              |
| Acetylglucosaminidase | C degradation           | 0.521                        | 0.331                        | 0.367        | 0.07         | <b>0.037</b> |
| <i>ara</i>            | C degradation           | 0.324                        | 0.817                        | <b>0.016</b> | 0.251        | 0.7          |
| Pectinase             | C degradation           | <b>0.02</b>                  | 0.625                        | 0.443        | 0.062        | <b>0.041</b> |
| Xylanase              | C degradation           | 0.973                        | 0.939                        | <b>0.004</b> | 0.104        | 0.534        |
| <i>mmoX</i>           | CH <sub>4</sub> consume | 0.632                        | 0.595                        | 0.142        | <b>0.048</b> | 0.125        |
| <i>dbdC</i>           | Aromatics               | 0.882                        | 0.618                        | <b>0.009</b> | 0.186        | 0.408        |
| <i>nphA</i>           | Aromatics               | 0.438                        | 0.365                        | <b>0.035</b> | 0.189        | 0.694        |
| BADH                  | Hydrocarbons            | 0.877                        | 0.727                        | <b>0.024</b> | 0.512        | 0.9          |
| <i>cpnA</i>           | Hydrocarbons            | 0.969                        | 0.703                        | <b>0.043</b> | 0.282        | 0.699        |
| <i>rd</i>             | Herbicides              | 0.18                         | 0.587                        | <b>0.045</b> | 0.381        | 0.666        |

44

45

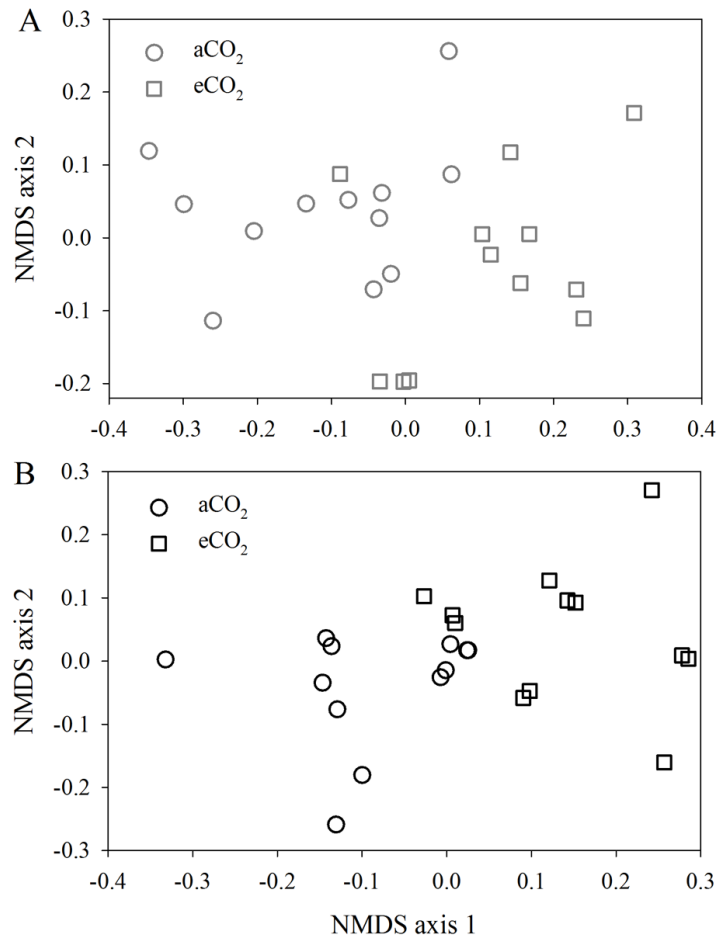

46  
47

48 **Figure S1** Non-metric multidimensional scaling (NMDS) analysis of elevated CO<sub>2</sub> (eCO<sub>2</sub>)  
49 and ambient CO<sub>2</sub> (aCO<sub>2</sub>) samples at the depths of 0-5 cm (A) and the 5-15 cm (B) based on  
50 the Bray-Curtis values of GeoChip detected *gyrB* gene.

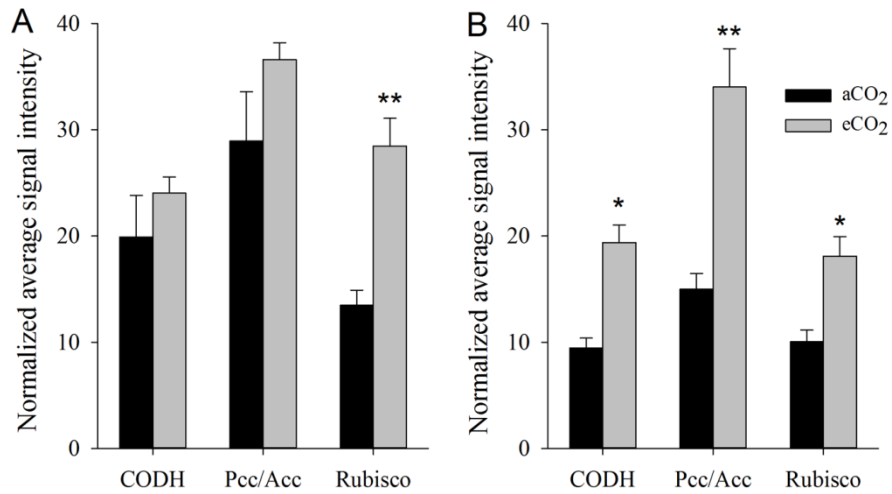

51  
52

53 **Figure S2** The normalized signal intensity of the detected key gene families involved in CO<sub>2</sub>  
 54 fixation. Rubisco: ribulose, 5-bisphosphate carboxylase/oxygenase; CODH: carbon  
 55 monoxide dehydrogenase; Pcc/Acc: propionyl-CoA/acetyl-CoA carboxylase. Data are  
 56 presented as mean ± SE (standard error,  $n = 12$ ). \*:  $P < 0.05$ ; \*\*:  $P < 0.01$  based on t-test  
 57 between elevated CO<sub>2</sub> (eCO<sub>2</sub>) and ambient CO<sub>2</sub> (aCO<sub>2</sub>) samples in the soil depths of 0-5 cm  
 58 (A) and 5-15 cm (B).

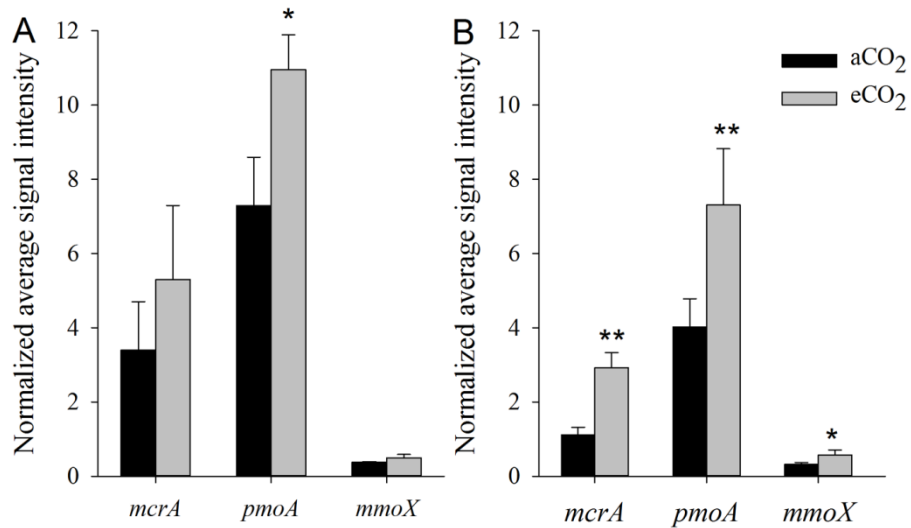

59  
60  
61  
62  
63  
64  
65  
66

**Figure S3** The normalized signal intensity of the detected key gene families involved in CH<sub>4</sub> cycling. *mcrA*: the alpha-subunit of methyl coenzyme M reductase for methane production; *pmoA*: particulate methane monooxygenase, and *mmoX*: methane monooxygenase for methane consumption. Data are presented as mean ± SE (standard error,  $n = 12$ ). \*:  $P < 0.05$ ; \*\*:  $P < 0.01$  based on t-test between elevated CO<sub>2</sub> (eCO<sub>2</sub>) and ambient CO<sub>2</sub> (aCO<sub>2</sub>) samples in the soil depth of 0-5 cm (A) and 5-15 cm (B).

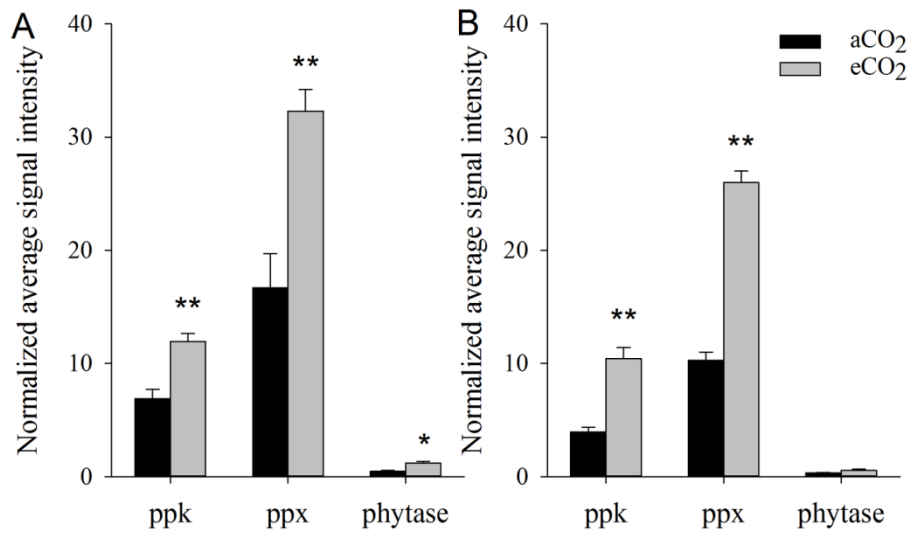

67  
68

69 **Figure S4** The abundance of detected key genes involved in P utilization in the soil depth of  
70 0-5 cm (A) and 5-15 cm (B). Ppx, exopolyphosphatase for inorganic polyphosphate  
71 degradation; Ppk, polyphosphate kinase for polyphosphate biosynthesis in prokaryotes; and  
72 phytase for phytate degradation. Data are presented as mean  $\pm$  SE. \*:  $P < 0.05$ ; \*\*:  $P < 0.01$   
73 based on the Student t-test.
